# Supplementary material for: Polybutadiene Vitrimers with Tunable Epoxy Ratios: Preparation and Properties
Source: MDPI journal article supplement (doi:10.3390/polym13234157), 2021-11-28
Supplement: s1 [file s1]

# Polybutadiene Vitrimers with Tunable Epoxy Ratios: Preparation and Properties

Liqian Zhu, Li Xu, Suyun Jie and Bogeng Li \*

State Key Laboratory of Chemical Engineering, College of Chemical and Biological Engineering, Zhejiang University, Hangzhou 310027, China; liqianzhu@zju.edu.cn (L.Z.); 11628036@zju.edu.cn (L.X.); jiesy@zju.edu.cn (S.J.)

\* Correspondence: bgli@zju.edu.cn; Tel.: +86-571-8795-2623

## 1. Preparation of Epoxidized Polybutadiene (EPBx)

Firstly, the cis-polybutadiene rubber was added into a flask and dissolved in DCE. The catalyst (5 wt % relative to the polybutadiene weight) dissolved in DCE were mixed with aqueous H<sub>2</sub>O<sub>2</sub> solution (10, 15, 25 and 35 mol. % relative to the diene content) under magnetic stirring at 60 °C to form the liquid-liquid emulsion in another flask. Then the emulsion was added dropwise into the polybutadiene solution, and the reaction was maintained under constant stirring at 60 °C. After 4 h, the mixture was cooled at 5 °C for 15 min and centrifuged to remove the catalyst. EPBx with x the epoxy ratio (i.e., the molar ratio of [H<sub>2</sub>O<sub>2</sub>]/[C=C]) was obtained by precipitation with methanol, followed by vacuum-drying at 30 °C overnight.

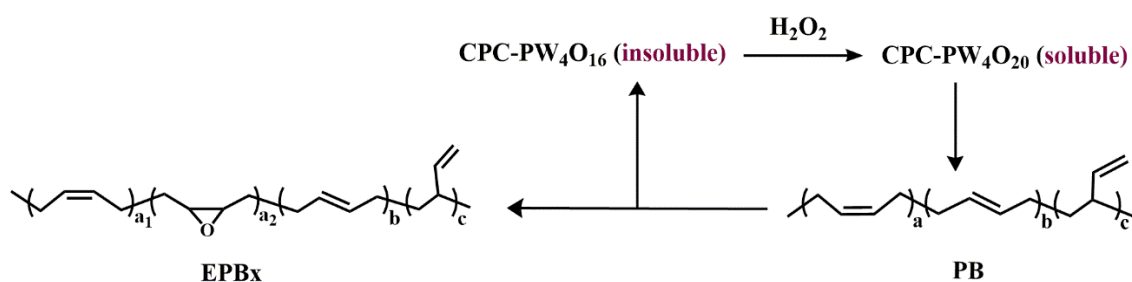

**Figure S1.** The epoxidation of polybutadiene via reaction-controlled phase-transfer catalysis.

## 2. Structure Characterization of PB Vitrimers

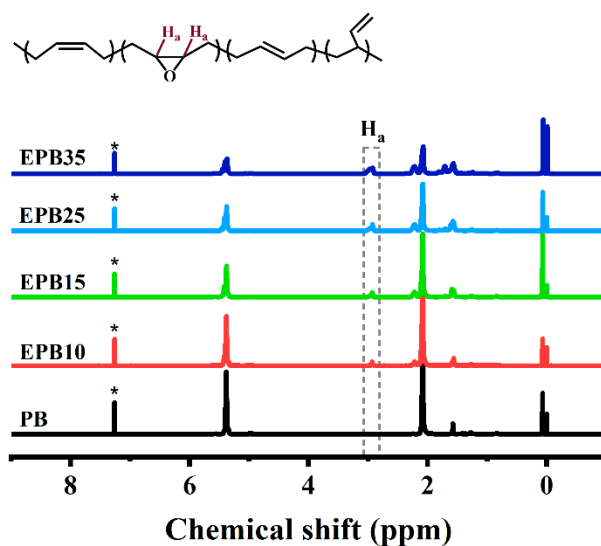

**Figure S2.**  $^1\text{H}$  NMR spectra of polybutadiene with different epoxy ratios.

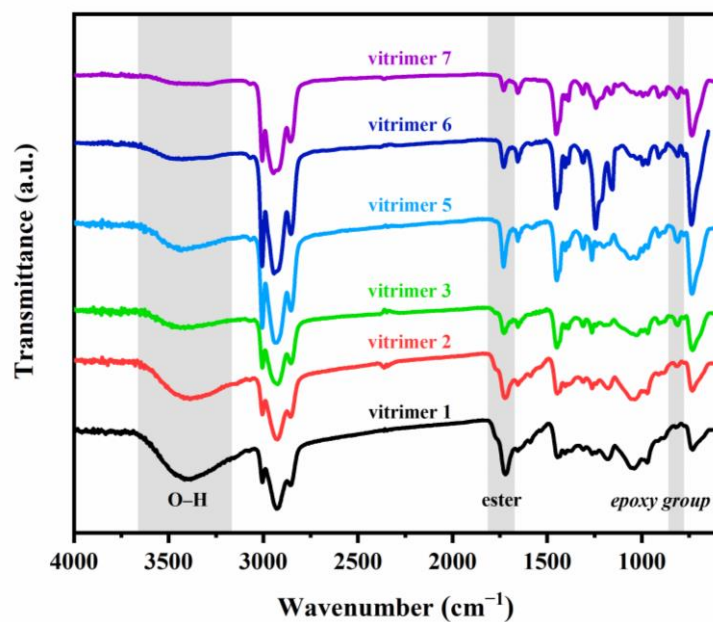

**Figure S3.** FT-IR spectra of PB vitrimers.

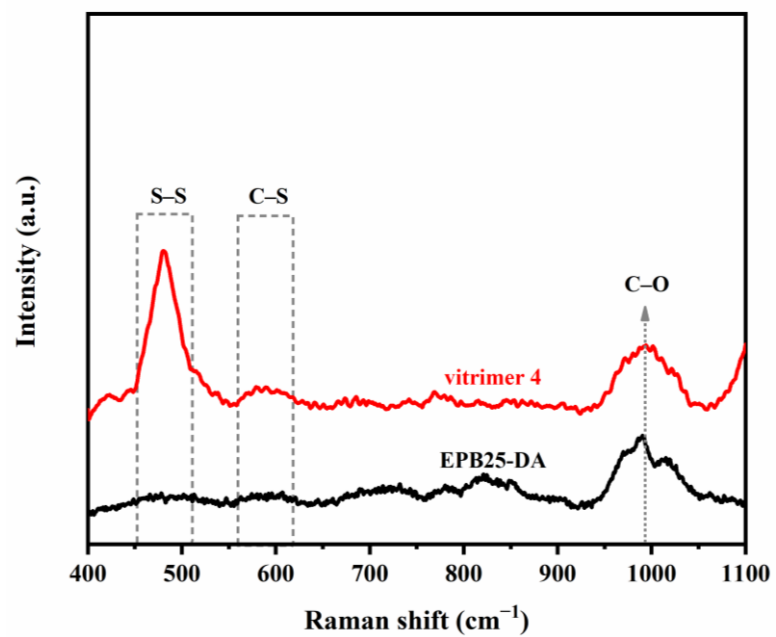

**Figure S4.** Raman spectra of vitrimer 4 and EPB25-DA.

### 3. Performance of PB Vitrimers

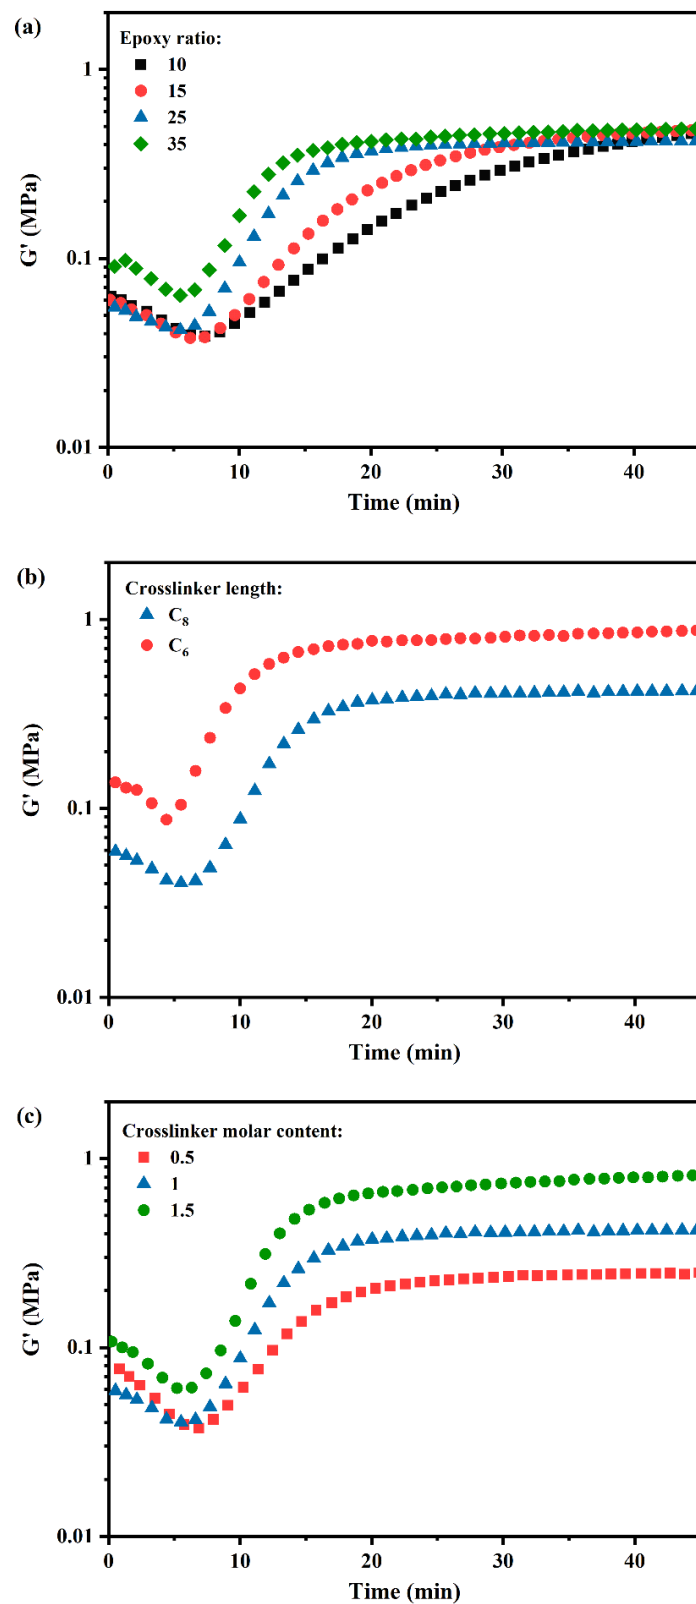

**Figure S5.** Crosslinking profiles of PB vitrimers with the modification of network parameters: (a) epoxy ratio, (b) crosslinker length, (c) crosslinker molar content.

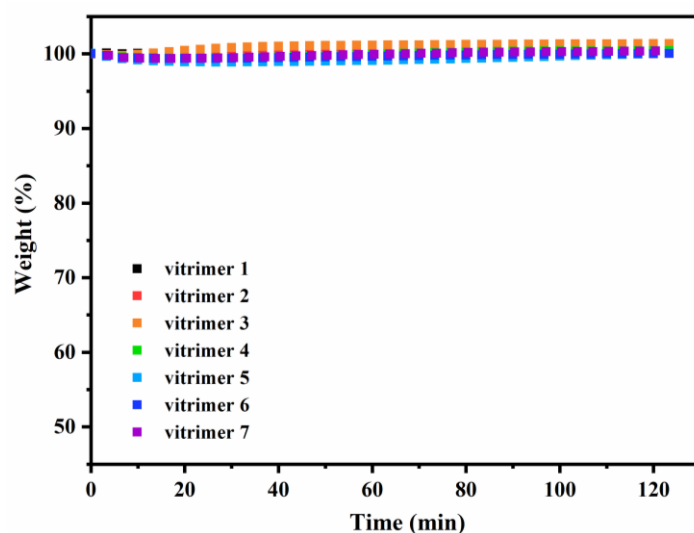

**Figure S6.** Isothermal TGA profiles of PB vitrimers in air at 150 °C for 2 h.

**Table S1** The mechanical properties of PB vitrimers

| Vitrimer                         | Parameters | $v_e$<br>( $10^{-4}$ mol/cm $^{-3}$ ) | Tensile strength<br>(MPa) | Strain at<br>break (%) |
|----------------------------------|------------|---------------------------------------|---------------------------|------------------------|
| <b>Epoxy ratio</b>               |            |                                       |                           |                        |
| 1                                | 10         | 3.93                                  | $1.26 \pm 0.06$           | $79.7 \pm 7.7$         |
| 2                                | 15         | 4.15                                  | $1.29 \pm 0.06$           | $74.3 \pm 0.4$         |
| 4                                | 25         | 4.52                                  | $1.42 \pm 0.06$           | $70.6 \pm 2.2$         |
| 7                                | 35         | 4.76                                  | $1.44 \pm 0.09$           | $64.1 \pm 7.5$         |
| <b>Crosslinker length</b>        |            |                                       |                           |                        |
| 4                                | C $_8$     | 4.52                                  | $1.42 \pm 0.06$           | $70.6 \pm 2.2$         |
| 6                                | C $_6$     | 5.93                                  | $1.44 \pm 0.07$           | $65.5 \pm 2.2$         |
| <b>Crosslinker molar content</b> |            |                                       |                           |                        |
| 3                                | 0.5        | 3.14                                  | $1.33 \pm 0.06$           | $117.6 \pm 15.2$       |
| 4                                | 1.0        | 4.52                                  | $1.42 \pm 0.06$           | $70.6 \pm 2.2$         |
| 5                                | 1.5        | 6.40                                  | $1.49 \pm 0.10$           | $65.7 \pm 7.6$         |

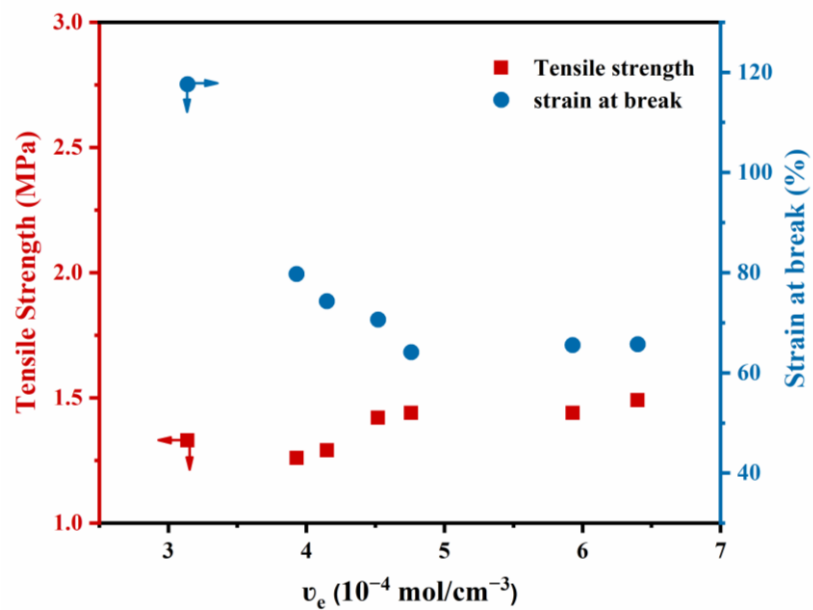

**Figure S7.** The relationship between mechanical properties and crosslinking density.

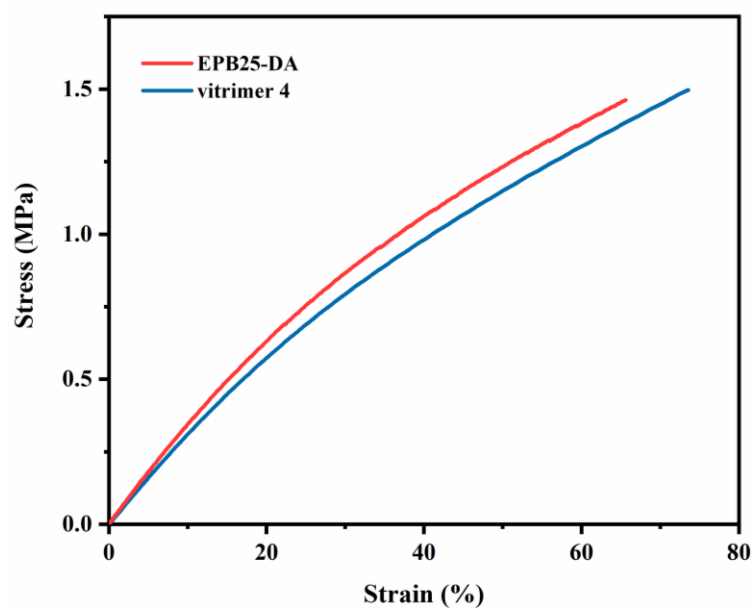

**Figure S8.** Typical stress–strain curves of vitrimer 4 and EPB25-DA.

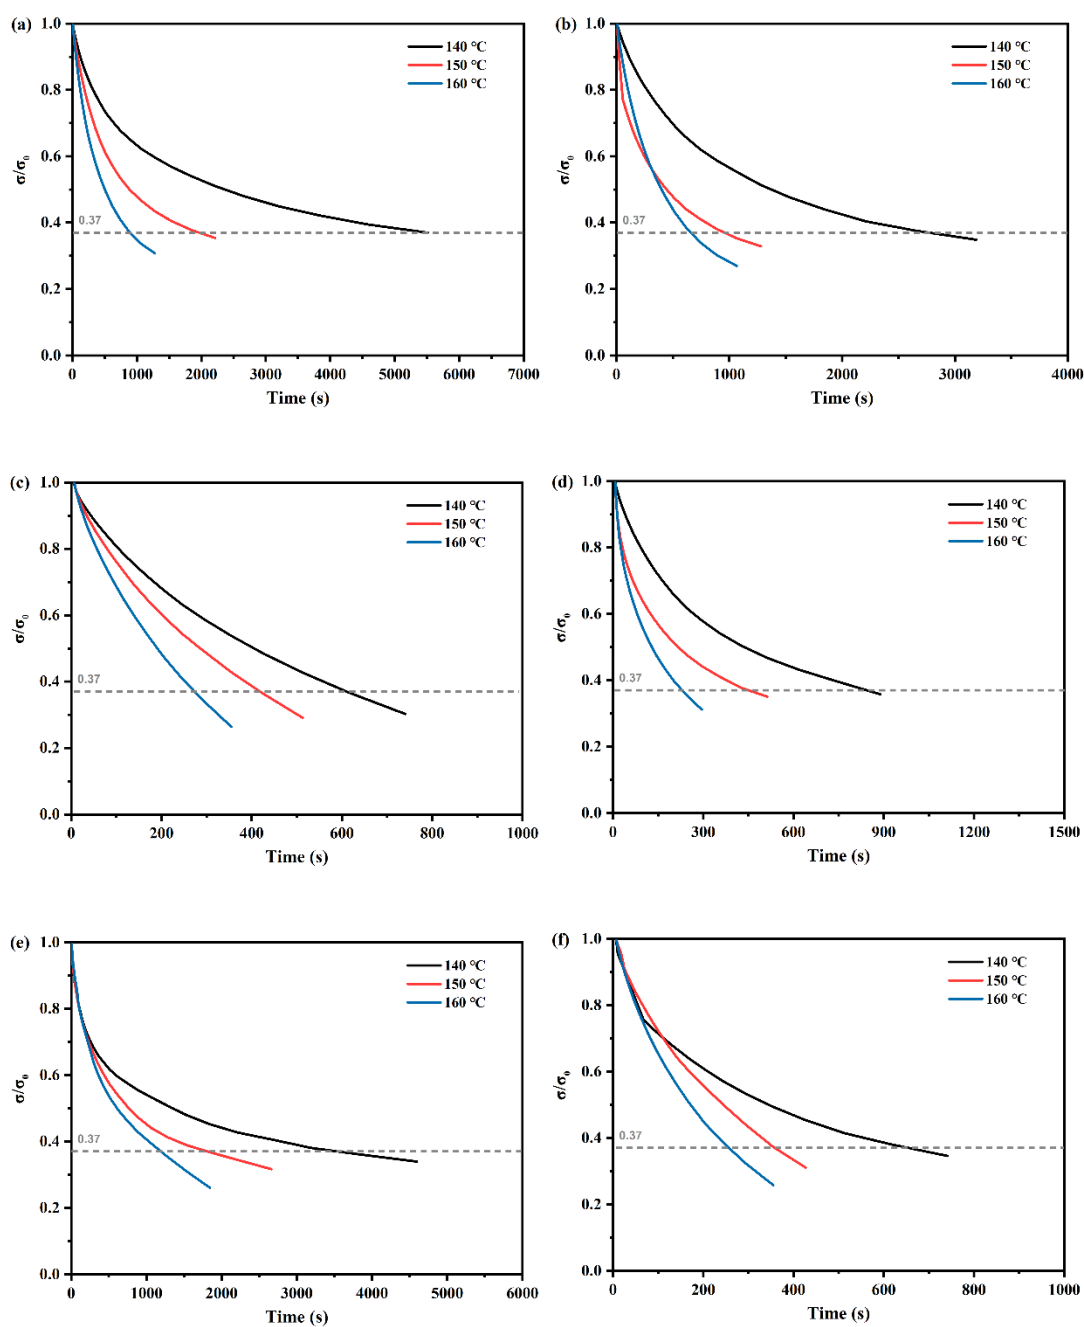

**Figure S9.** Stress relaxation curves of (a) vitrimer 1, (b) vitrimer 2, (c) vitrimer 3, (d) vitrimer 5, (e) vitrimer 6, (f) vitrimer 7.

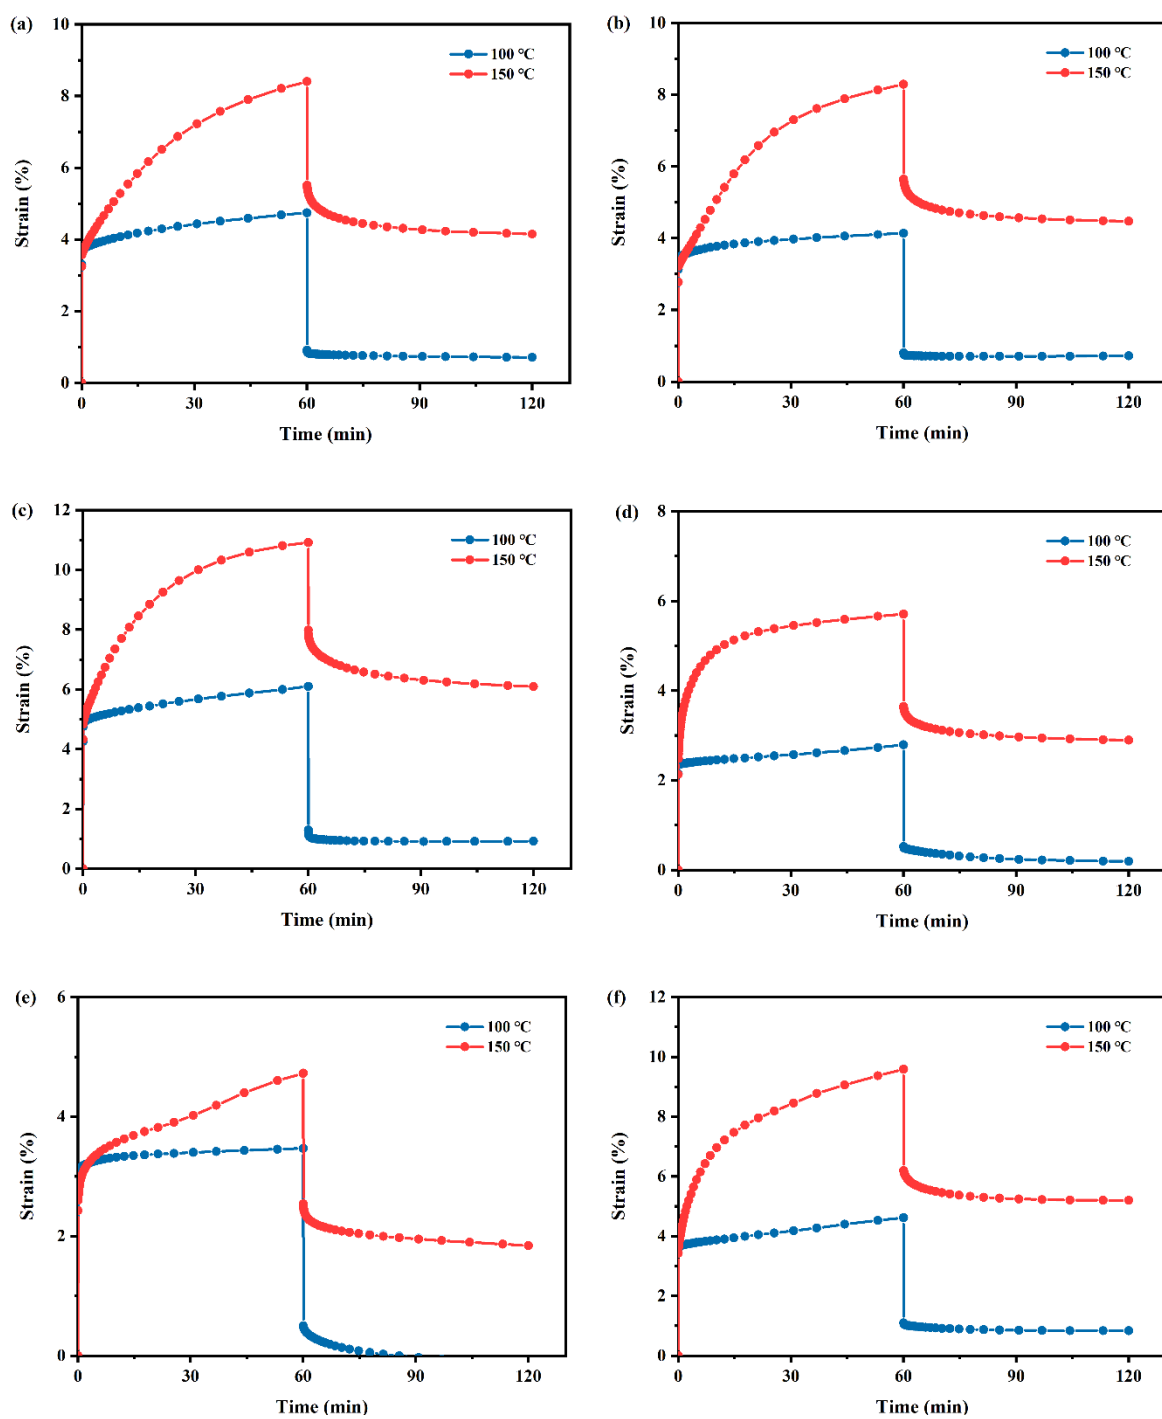

**Figure S10.** Creep recovery curves of PB vitrimers: (a) vitramer 1; (b) vitramer 2; (c) vitramer 3; (d) vitramer 5; (e) vitramer 6; (f) vitramer 7.



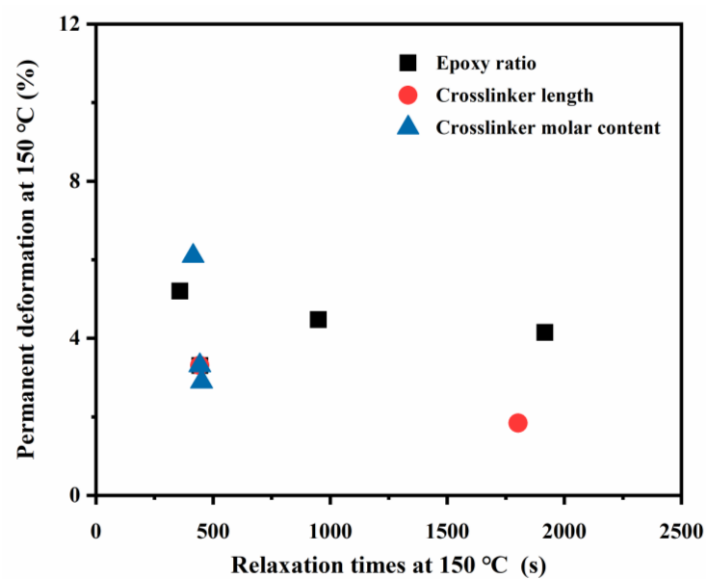

**Figure S11.** The relationship between permanent deformation and relaxation times at 150 °C.

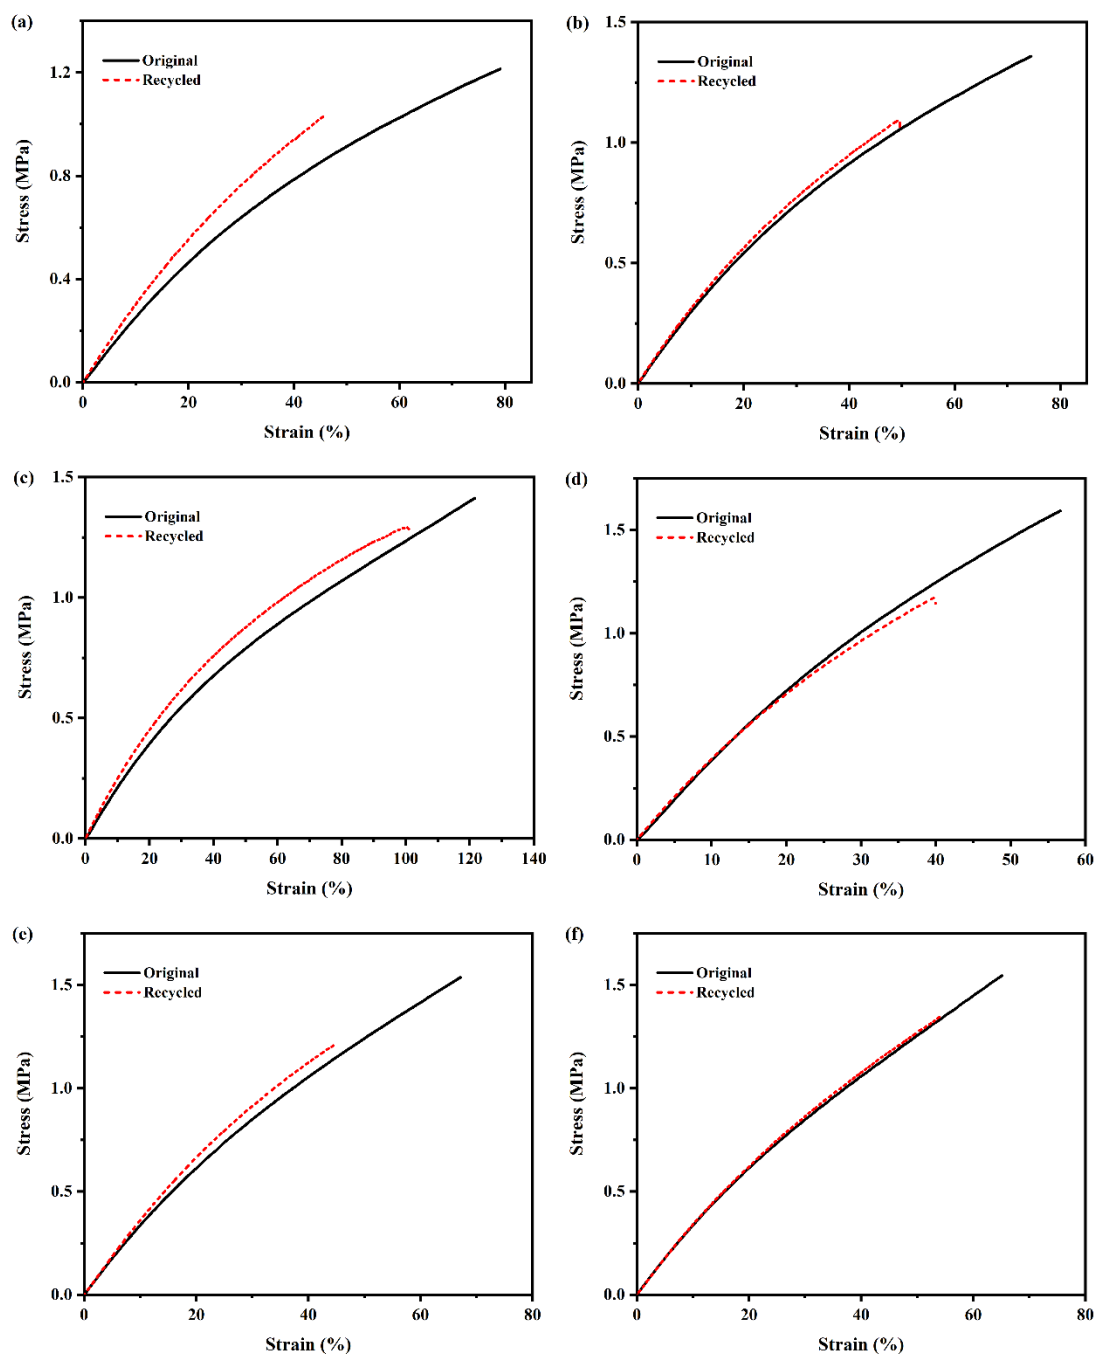

**Figure S12.** Typical stress–strain curves of PB vitrimers: (a) vitrimer 1; (b) vitrimer 2; (c) vitrimer 3; (d) vitrimer 5; (e) vitrimer 6; (f) vitrimer 7.

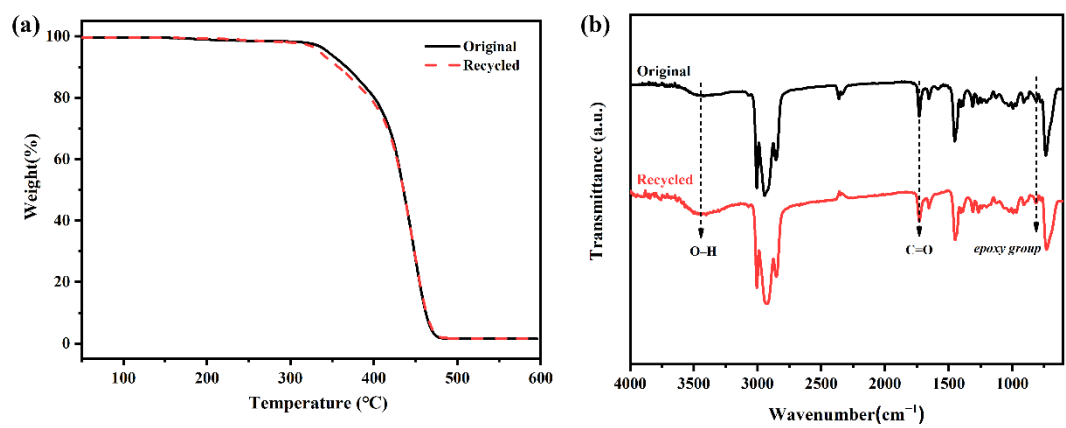

**Figure S13.** (a) TGA of original and recycled vitrimer 4. (b) FT-IR spectra of original and recycled vitrimer

4.

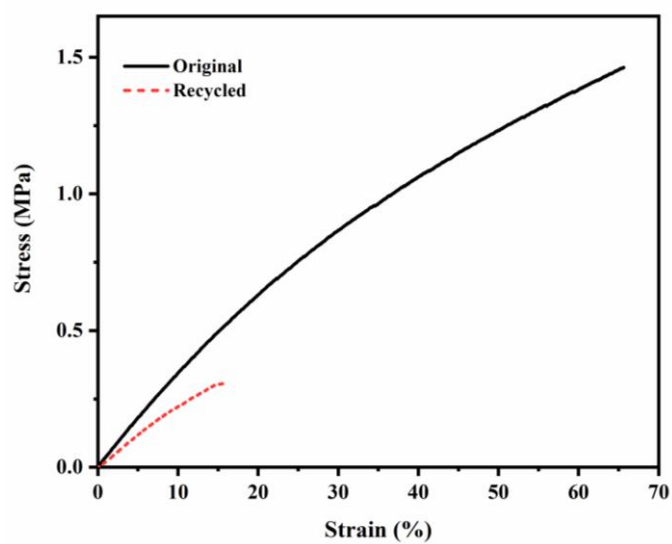

**Figure S14.** Typical stress-strain curves of original and recycled EPB25-DA.
